# Supplementary material
Source: Royal Society of Chemistry journal article supplement (doi:10.1039/d6nj01379a)
Supplement: d6nj01379a1.pdf [file d6nj01379a1.pdf]

## Supporting Information

# **A<sub>2</sub>Sb<sub>2</sub>SO<sub>4</sub>F<sub>6</sub> (A = NH<sub>4</sub><sup>+</sup>, Na<sup>+</sup>): Two Sulfate Fluoride Crystals Exhibiting Enhanced Birefringence Driven by Stereochemically Active Antimony (III)**

*Jia Wang<sup>a</sup>, Wenbin Zhang<sup>a,b</sup>, Zhihua Yang<sup>a,b</sup>, Shujuan Han<sup>\*a,b</sup> and Shilie Pan<sup>\*a,b</sup>*

<sup>a</sup> Center of Materials Science and Optoelectronics Engineering, University of Chinese Academy of Sciences, Beijing 100049, P.R. China. E-mail: [hansj@ms.xjb.ac.cn](mailto:hansj@ms.xjb.ac.cn).

<sup>b</sup> Research Center for Crystal Materials; CAS Key Laboratory of Functional Materials and Devices for Special Environmental Conditions; Xinjiang Key Laboratory of Functional Crystal Materials; Xinjiang Technical Institute of Physics and Chemistry, Chinese Academy of Sciences, 40-1 South Beijing Road, Urumqi 830011, P.R. China.

\*Corresponding authors: Shujuan Han (e-mail: [hansj@ms.xjb.ac.cn](mailto:hansj@ms.xjb.ac.cn)); Shilie Pan (e-mail: [slpan@ms.xjb.ac.cn](mailto:slpan@ms.xjb.ac.cn))

## EXPERIMENTAL SECTION

### Synthesis

#### (1) Reagents.

(NH<sub>4</sub>)<sub>2</sub>SO<sub>4</sub> (AR, 99 %), Na<sub>2</sub>SO<sub>4</sub> (AR, 99 %), and SbF<sub>3</sub> (AR, 99 %) are commercially available and used without further purification.

#### (2) Single crystal synthesis.

(NH<sub>4</sub>)<sub>2</sub>Sb<sub>2</sub>SO<sub>4</sub>F<sub>6</sub>: (NH<sub>4</sub>)<sub>2</sub>SO<sub>4</sub> (2.515 g) and SbF<sub>3</sub> (7.485 g) with a stoichiometry of 1 : 2.2 were placed in a disposable plastic cup and 20 ml of deionized water was added. Stir thoroughly, filter the undissolved raw materials and evaporate the deionized water at room temperature. After a large number of crystals have precipitated, a small amount of colorless and transparent rod-shaped crystals can be extracted from the block like product, washed with deionized water, and dried, as shown in Figure S1.

Na<sub>2</sub>Sb<sub>2</sub>SO<sub>4</sub>F<sub>6</sub>: Na<sub>2</sub>SO<sub>4</sub> (0.105 g) and SbF<sub>3</sub> (0.395 g) with a stoichiometry of 1 : 3 were placed in a disposable plastic cup and 40 ml of deionized water was added. Stir thoroughly and evaporate the deionized water at room temperature. After the deionized water has completely evaporated, micrometer sized crystals can be extracted from the product under a polarizing microscope.

(3) Synthesis of polycrystalline powder.

(NH<sub>4</sub>)<sub>2</sub>Sb<sub>2</sub>SO<sub>4</sub>F<sub>6</sub>: (NH<sub>4</sub>)<sub>2</sub>SO<sub>4</sub> (0.126 g) and SbF<sub>3</sub> (0.374 g) with a stoichiometry of 1 : 2.2 were placed in a disposable plastic cup and 30 ml of deionized water was added. Stir thoroughly and strain the undissolved raw materials, deionized water was evaporated at room temperature. After the deionized water is completely evaporated, the pure phase of (NH<sub>4</sub>)<sub>2</sub>Sb<sub>2</sub>SO<sub>4</sub>F<sub>6</sub> is obtained.

Na<sub>2</sub>Sb<sub>2</sub>SO<sub>4</sub>F<sub>6</sub>: Na<sub>2</sub>SO<sub>4</sub> (0.133 g) and SbF<sub>3</sub> (0.367 g) with a stoichiometry of 1 : 2.2 were placed in a disposable plastic cup and 30 ml of deionized water was added. Stir thoroughly and filter the undissolved raw materials. Cover and seal the disposable plastic cup with plastic wrap, and make some small holes in the plastic wrap, and slowly evaporate the deionized water at room temperature. After the deionized water is completely evaporated, the pure phase of Na<sub>2</sub>Sb<sub>2</sub>SO<sub>4</sub>F<sub>6</sub> is obtained.

### **Structural Determination**

Single-crystal X-ray diffraction data were collected on a Bruker SMART APEX II CCD diffractometer using Mo K $\alpha$  radiation ( $\lambda = 0.71073 \text{ \AA}$ ). Data reduction and integration were performed with the SAINT-Plus program,<sup>1</sup> and absorption corrections were applied using SADABS. The structures were solved and refined with the SHELX program package implemented in Olex. All non-hydrogen atoms were refined anisotropically by the full-matrix least-squares method.<sup>2</sup> The possible higher symmetry of the structures was checked using the PLATON program,<sup>3</sup> and the CheckCIF reports confirmed the reliability of the refined structures.

### **Powder X-ray Diffraction**

Phase purity was examined by powder X-ray diffraction (XRD) using a Bruker D2 PHASER diffractometer with Cu K $\alpha$  radiation ( $\lambda = 1.5418 \text{ \AA}$ ). The diffraction data were collected over a  $2\theta$  range of 5-70° with a step size of 0.02° and a counting time of 1 s per step. The experimental patterns match well with the simulated ones, indicating the good phase purity of the samples.

### **IR Spectroscopy**

Infrared spectra were recorded on a Shimadzu IR Affinity-1 Fourier transform infrared spectrometer in the range of 400-4000 cm<sup>-1</sup> with a resolution of 1 cm<sup>-1</sup>. The

samples were dried and ground with KBr in a mass ratio of approximately 1 : 100, followed by pressing into pellets for measurement.

### **UV–vis–NIR Diffuse Reflectance Spectroscopy**

Diffuse reflectance spectra were measured using a Shimadzu SolidSpec-3700 DUV spectrophotometer in the wavelength range of 200-2600 nm to determine the UV cutoff edges of the compounds.

### **Theoretical Calculations**

Electronic structure and optical properties were calculated using the CASTEP package based on density functional theory.<sup>4</sup> The plane-wave cutoff energy was set to 850 eV, and the Brillouin zone was sampled with a  $k$ -point mesh of  $3 \times 6 \times 2$ . The valence electron composition of  $(\text{NH}_4)_2\text{Sb}_2\text{SO}_4\text{F}_6$  and  $\text{Na}_2\text{Sb}_2\text{SO}_4\text{F}_6$  are H- $1s^1$ , N- $2s^22p^3$ , Sb- $5s^25p^3$ , S- $3s^23p^4$ , O- $2s^22p^4$ , F- $2s^22p^5$  and Na- $2p^63s^1$ , Sb- $5s^25p^3$ , S- $3s^23p^4$ , O- $2s^22p^4$ , F- $2s^22p^5$ . The real part of the dielectric function was obtained via the Kramers–Kronig transformation and obtained the birefringence of  $(\text{NH}_4)_2\text{Sb}_2\text{SO}_4\text{F}_6$  and  $\text{Na}_2\text{Sb}_2\text{SO}_4\text{F}_6$ .<sup>5</sup>

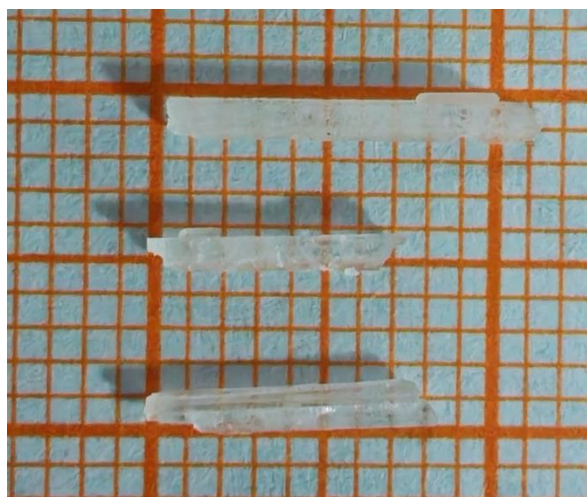

Figure S1. Crystal photograph of  $(\text{NH}_4)_2\text{Sb}_2\text{SO}_4\text{F}_6$ .

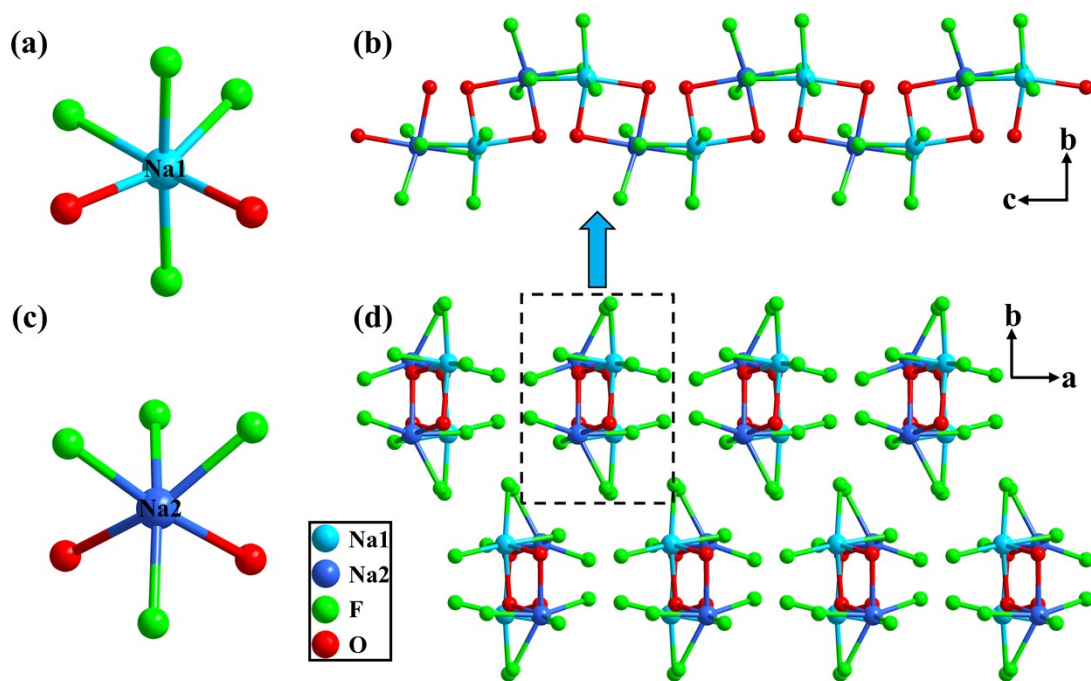

Figure S2 (a) The [Na1O<sub>2</sub>F<sub>4</sub>] polyhedron. (b) The one-dimensional chain displayed along the *a*-axis direction. (c) The [Na2O<sub>2</sub>F<sub>4</sub>] polyhedron. (d) The one-dimensional chain displayed along the *c*-axis direction.

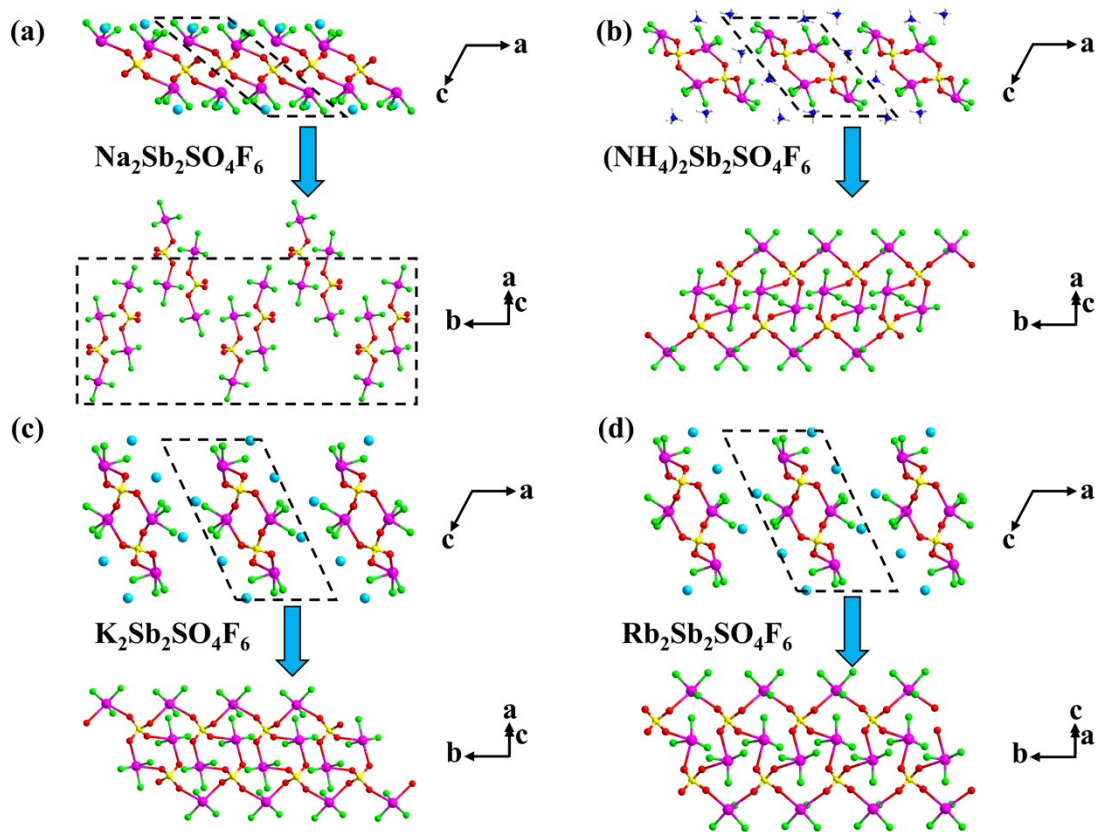

Figure S3 (a) The structure of  $\text{Na}_2\text{Sb}_2\text{SO}_4\text{F}_6$ . (b) The structure of  $(\text{NH}_4)_2\text{Sb}_2\text{SO}_4\text{F}_6$ . (c) The structure of  $\text{K}_2\text{Sb}_2\text{SO}_4\text{F}_6$ . (d) The structure of  $\text{Rb}_2\text{Sb}_2\text{SO}_4\text{F}_6$ .

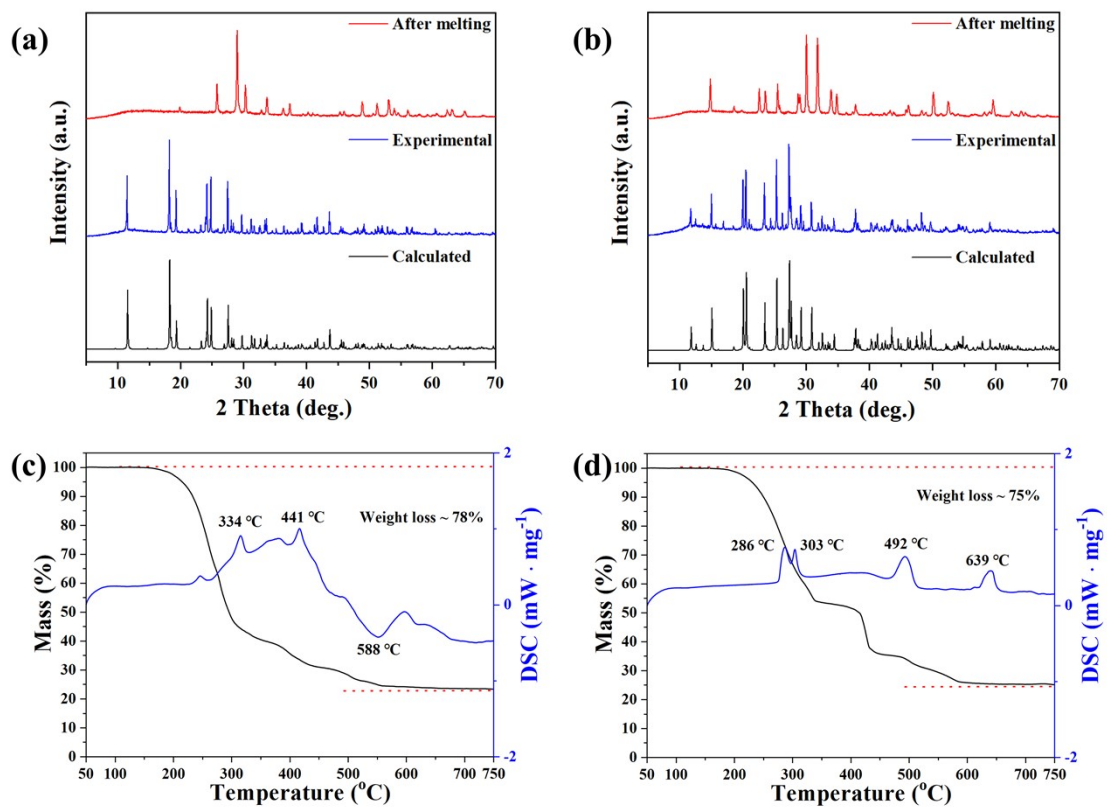

Figure S4 (a, b) X-ray powder diffraction patterns of  $(\text{NH}_4)_2\text{Sb}_2\text{SO}_4\text{F}_6$  and  $\text{Na}_2\text{Sb}_2\text{SO}_4\text{F}_6$ . (c, d) TG-DSC curves of  $(\text{NH}_4)_2\text{Sb}_2\text{SO}_4\text{F}_6$  and  $\text{Na}_2\text{Sb}_2\text{SO}_4\text{F}_6$ .

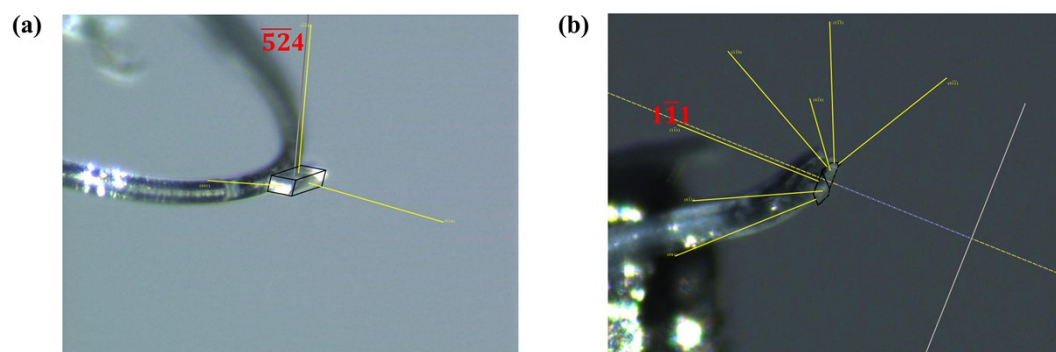

Figure S5 (a) The specific crystal orientations of  $(\text{NH}_4)_2\text{Sb}_2\text{SO}_4\text{F}_6$ . (b) The specific crystal orientations of  $\text{Na}_2\text{Sb}_2\text{SO}_4\text{F}_6$ .

Table S1. Crystal data and structure refinement details for (NH<sub>4</sub>)<sub>2</sub>Sb<sub>2</sub>SO<sub>4</sub>F<sub>6</sub> and Na<sub>2</sub>Sb<sub>2</sub>SO<sub>4</sub>F<sub>6</sub>.

|                                                                  |                                                                                |                                                                |
|------------------------------------------------------------------|--------------------------------------------------------------------------------|----------------------------------------------------------------|
| Empirical formula                                                | (NH <sub>4</sub> ) <sub>2</sub> Sb <sub>2</sub> SO <sub>4</sub> F <sub>6</sub> | Na <sub>2</sub> Sb <sub>2</sub> SO <sub>4</sub> F <sub>6</sub> |
| Formula weight                                                   | 489.64                                                                         | 499.54                                                         |
| Crystal system                                                   | Monoclinic                                                                     | Monoclinic                                                     |
| Space group, <i>Z</i>                                            | <i>P</i> 2 <sub>1</sub> / <i>c</i> , 4                                         | <i>P</i> 2 <sub>1</sub> / <i>c</i> , 4                         |
| <i>a</i> / Å                                                     | 9.9968(14)                                                                     | 6.9733(4)                                                      |
| <i>b</i> / Å                                                     | 5.7135(7)                                                                      | 14.0305(10)                                                    |
| <i>c</i> / Å                                                     | 18.886(3)                                                                      | 9.5562(7)                                                      |
| $\beta$ / °                                                      | 103.718(5)                                                                     | 112.392(2)                                                     |
| <i>V</i> / Å <sup>3</sup>                                        | 1048.0(2)                                                                      | 864.47(10)                                                     |
| Calculated density (g/cm <sup>3</sup> )                          | 3.103                                                                          | 3.838                                                          |
| Absorption coefficient (mm <sup>-1</sup> )                       | 5.441                                                                          | 6.683                                                          |
| <i>F</i> (000)                                                   | 904                                                                            | 904                                                            |
| 2 $\theta$ range (°)                                             | 2.097 - 27.500                                                                 | 2.724 - 27.501                                                 |
|                                                                  | -12 ≤ <i>h</i> ≤ 12                                                            | -9 ≤ <i>h</i> ≤ 9                                              |
| Limiting indices                                                 | -7 ≤ <i>k</i> ≤ 7                                                              | -18 ≤ <i>k</i> ≤ 18                                            |
|                                                                  | -24 ≤ <i>l</i> ≤ 24                                                            | -12 ≤ <i>l</i> ≤ 12                                            |
| Reflections collected                                            | 35766                                                                          | 30072                                                          |
| Independent reflections ( <i>R</i> <sub>int</sub> )              | 2404 (0.0584)                                                                  | 1984 (0.0793)                                                  |
| Completeness (%)                                                 | 99.7                                                                           | 99.9                                                           |
| Goodness-of-fit on <i>F</i> <sup>2</sup>                         | 1.039                                                                          | 1.076                                                          |
| Data/restraints/parameters                                       | 2403 / 1 / 95                                                                  | 1984 / 0 / 136                                                 |
| Final <i>R</i> indices [ <i>I</i> > 2σ( <i>I</i> )] <sup>a</sup> | <i>R</i> <sub>1</sub> = 0.0186                                                 | <i>R</i> <sub>1</sub> = 0.0188                                 |
|                                                                  | <i>wR</i> <sub>2</sub> = 0.0453                                                | <i>wR</i> <sub>2</sub> = 0.0411                                |
| <i>R</i> indices (all data) <sup>a</sup>                         | <i>R</i> <sub>1</sub> = 0.0219                                                 | <i>R</i> <sub>1</sub> = 0.0254                                 |
|                                                                  | <i>wR</i> <sub>2</sub> = 0.0471                                                | <i>wR</i> <sub>2</sub> = 0.0434                                |
| Largest diff. peak / hole (e·Å <sup>-3</sup> )                   | 0.505 / -0.778                                                                 | 0.632 / -0.785                                                 |

$$^a R_1 = \sum ||F_o| - |F_c|| / \sum |F_o| \text{ and } wR_2 = [w(F_o^2 - F_c^2)^2 / wF_o^4]^{1/2} \text{ for } F_o^2 > 2\sigma(F_o^2)$$

Table S2. Selected bond lengths (Å) and angles (deg) for (NH<sub>4</sub>)<sub>2</sub>Sb<sub>2</sub>SO<sub>4</sub>F<sub>6</sub>.

|                     |        |                   |        |
|---------------------|--------|-------------------|--------|
| Sb(1)-O(1)          | 2.4185 | Sb(2)-F(4)        | 1.9472 |
| Sb(1)-O(2)#1        | 2.6044 | Sb(2)-F(5)        | 1.9539 |
| Sb(1)-F(1)          | 1.9582 | Sb(2)-F(6)        | 1.9165 |
| Sb(1)-F(2)          | 1.9796 | S(1)-O(1)         | 1.4761 |
| Sb(1)-F(3)          | 1.9124 | S(1)-O(2)         | 1.4581 |
| Sb(2)-O(3)#2        | 2.5938 | S(1)-O(3)         | 1.4574 |
| Sb(2)-O(4)#3        | 2.5793 | S(1)-O(4)         | 1.454  |
| O(1)-Sb(1)-O(2)#1   | 114.8  | F(4)-Sb(2)-F(5)   | 84.6   |
| F(1)-Sb(1)-O(1)     | 76.1   | F(5)-Sb(2)-O(3)#2 | 83.8   |
| F(1)-Sb(1)-O(2)#1   | 158.3  | F(5)-Sb(2)-O(4)#3 | 154.6  |
| F(1)-Sb(1)-F(2)     | 81.9   | F(6)-Sb(2)-O(3)#2 | 80.9   |
| F(2)-Sb(1)-O(1)     | 153.1  | F(6)-Sb(2)-O(4)#3 | 72.7   |
| F(2)-Sb(1)-O(2)#1   | 81.7   | F(6)-Sb(2)-F(4)   | 87.5   |
| F(3)-Sb(1)-O(1)     | 80.4   | F(6)-Sb(2)-F(5)   | 85.7   |
| F(3)-Sb(1)-O(2)#1   | 76.1   | O(2)-S(1)-O(1)    | 108.6  |
| F(3)-Sb(1)-F(1)     | 88     | O(3)-S(1)-O(1)    | 109.9  |
| F(3)-Sb(1)-F(2)     | 83.5   | O(3)-S(1)-O(2)    | 107.3  |
| O(4)#3-Sb(2)-O(3)#2 | 105.2  | O(4)-S(1)-O(1)    | 109.1  |
| F(4)-Sb(2)-O(3)#2   | 164.2  | O(4)-S(1)-O(2)    | 112    |
| F(4)-Sb(2)-O(4)#3   | 81.4   | O(4)-S(1)-O(3)    | 109.9  |

Symmetry codes: #1 -x+1,-y,-z+1; #2 -x,-y+1,-z+1; #3 -x,-y,-z+1.

Table S3. Selected bond lengths (Å) and angles (deg) for Na<sub>2</sub>Sb<sub>2</sub>SO<sub>4</sub>F<sub>6</sub>.

---

|                     |        |                     |        |
|---------------------|--------|---------------------|--------|
| Na(1)-O(3)#2        | 2.563  | Sb(1)-O(2)#4        | 2.431  |
| Na(1)-O(4)          | 2.385  | Sb(1)-F(1)          | 1.967  |
| Na(1)-F(1)          | 2.283  | Sb(1)-F(2)          | 1.905  |
| Na(1)-F(2)#3        | 2.325  | Sb(1)-F(3)          | 1.953  |
| Na(1)-F(5)#1        | 2.316  | Sb(2)-O(1)#2        | 2.441  |
| Na(1)-F(6)          | 2.308  | Sb(2)-F(4)          | 1.915  |
| Na(2)-O(3)#5        | 2.433  | Sb(2)-F(5)          | 1.965  |
| Na(2)-O(4)#4        | 2.489  | Sb(2)-F(6)          | 1.950  |
| Na(2)-F(1)#5        | 2.326  | S(1)-O(1)           | 1.496  |
| Na(2)-F(3)          | 2.313  | S(1)-O(2)           | 1.498  |
| Na(2)-F(4)#6        | 2.390  | S(1)-O(3)           | 1.465  |
| Na(2)-F(5)          | 2.302  | S(1)-O(4)           | 1.461  |
| <hr/>               |        |                     |        |
| O(4)-Na(1)-O(3)#2   | 89.57  | F(1)#5-Na(2)-F(4)#6 | 69.87  |
| F(1)-Na(1)-O(3)#2   | 162.80 | F(3)-Na(2)-F(1)#5   | 160.15 |
| F(1)-Na(1)-O(4)     | 78.92  | F(3)-Na(2)-F(4)#6   | 123.29 |
| F(2)#3-Na(1)-O(3)#2 | 101.08 | F(5)-Na(2)-F(1)#5   | 82.52  |
| F(2)#3-Na(1)-O(4)   | 160.84 | F(5)-Na(2)-F(3)     | 108.22 |
| F(5)#1-Na(1)-O(3)#2 | 84.00  | F(5)-Na(2)-F(4)#6   | 97.36  |
| F(5)#1-Na(1)-O(4)   | 89.28  | F(1)-Sb(1)-O(2)#4   | 153.42 |
| F(6)-Na(1)-O(3)#2   | 89.59  | F(2)-Sb(1)-O(2)#4   | 76.30  |
| F(6)-Na(1)-O(4)     | 88.73  | F(2)-Sb(1)-F(1)     | 85.66  |
| F(1)-Na(1)-F(2)#3   | 86.86  | F(2)-Sb(1)-F(3)     | 89.76  |
| F(1)-Na(1)-F(5)#1   | 83.13  | F(3)-Sb(1)-O(2)#4   | 77.68  |
| F(1)-Na(1)-F(6)     | 102.75 | F(3)-Sb(1)-F(1)     | 82.96  |
| F(5)#1-Na(1)-F(2)#3 | 76.20  | F(4)-Sb(2)-O(1)#2   | 74.78  |
| F(6)-Na(1)-F(2)#3   | 107.06 | F(4)-Sb(2)-F(5)     | 85.02  |
| F(6)-Na(1)-F(5)#1   | 173.30 | F(4)-Sb(2)-F(6)     | 88.19  |
| O(3)#5-Na(2)-O(4)#4 | 90.23  | F(5)-Sb(2)-O(1)#2   | 153.47 |
| F(1)#5-Na(2)-O(3)#5 | 82.38  | F(6)-Sb(2)-O(1)#2   | 78.51  |

---

|                     |        |                 |        |
|---------------------|--------|-----------------|--------|
| F(1)#5-Na(2)-O(4)#4 | 84.94  | F(6)-Sb(2)-F(5) | 83.92  |
| F(3)-Na(2)-O(3)#5   | 81.75  | O(1)-S(1)-O(2)  | 106.37 |
| F(3)-Na(2)-O(4)#4   | 83.27  | O(3)-S(1)-O(1)  | 109.14 |
| F(4)#6-Na(2)-O(3)#5 | 151.18 | O(3)-S(1)-O(2)  | 109.27 |
| F(4)#6-Na(2)-O(4)#4 | 79.99  | O(4)-S(1)-O(1)  | 109.46 |
| F(5)-Na(2)-O(3)#5   | 86.26  | O(4)-S(1)-O(2)  | 109.09 |
| F(5)-Na(2)-O(4)#4   | 167.32 | O(4)-S(1)-O(3)  | 113.28 |

Symmetry codes: #1  $x-1, y, z$ ; #2  $x, -y+3/2, z-1/2$ ; #3  $-x+1, -y+1, -z+1$ ; #4  $x+1, -y+3/2, z+1/2$ ; #5  $x+1, y, z$ ; #6  $-x+2, -y+1, -z+1$ .

Table S4. Atomic coordinates and equivalent isotropic displacement parameters for  $(\text{NH}_4)_2\text{Sb}_2\text{SO}_4\text{F}_6$ .  $U_{\text{eq}}$  is defined as one third of the trace of the orthogonalized  $U_{ij}$  tensor.

| Atom  | $x$  | $y$  | $Z$  | $U_{\text{eq}} (\text{\AA}^2)$ | BVS |
|-------|------|------|------|--------------------------------|-----|
| Sb(1) | 5028 | 2818 | 5917 | 27                             | 3.1 |
| Sb(2) | -557 | 2484 | 6626 | 25                             | 3.1 |
| S(1)  | 2554 | 2288 | 4364 | 24                             | 6.2 |
| O(1)  | 2860 | 3593 | 5058 | 40                             | 1.8 |
| O(2)  | 3809 | 1124 | 4284 | 59                             | 1.7 |
| O(3)  | 2145 | 3917 | 3756 | 52                             | 1.8 |
| O(4)  | 1449 | 634  | 4362 | 60                             | 1.8 |
| F(1)  | 4142 | 5165 | 6409 | 36                             | 0.9 |
| F(2)  | 6198 | 2423 | 6914 | 42                             | 0.8 |
| F(3)  | 3905 | 504  | 6226 | 38                             | 1.0 |
| F(4)  | 1011 | 361  | 6849 | 42                             | 0.9 |
| F(5)  | 753  | 4813 | 7137 | 45                             | 0.9 |
| F(6)  | 40   | 3394 | 5773 | 42                             | 1.0 |

Table S5. Atomic coordinates and equivalent isotropic displacement parameters for  $\text{Na}_2\text{Sb}_2\text{SO}_4\text{F}_6$ .  $U_{\text{eq}}$  is defined as one third of the trace of the orthogonalized  $U_{ij}$  tensor.

| Atom  | $x$   | $y$  | $Z$  | $U_{\text{eq}} (\text{\AA}^2)$ | BVS |
|-------|-------|------|------|--------------------------------|-----|
| Na(1) | 3278  | 6532 | 3451 | 26                             | 1.1 |
| Na(2) | 11108 | 6506 | 6147 | 25                             | 1.0 |
| Sb(1) | 6930  | 6142 | 7684 | 17                             | 3.0 |
| Sb(2) | 7404  | 6048 | 1895 | 18                             | 3.0 |
| S(1)  | 2102  | 8768 | 4767 | 17                             | 6.0 |
| O(1)  | 3744  | 9396 | 5834 | 28                             | 1.7 |
| O(2)  | 498   | 9418 | 3710 | 24                             | 1.7 |
| O(3)  | 1163  | 8201 | 5627 | 28                             | 1.8 |
| O(4)  | 2998  | 8188 | 3899 | 26                             | 1.9 |
| F(1)  | 4376  | 6557 | 6028 | 25                             | 1.2 |
| F(2)  | 6934  | 5116 | 6381 | 30                             | 1.2 |
| F(3)  | 8250  | 6958 | 6655 | 27                             | 1.0 |
| F(4)  | 7173  | 4990 | 3088 | 31                             | 1.1 |
| F(5)  | 10062 | 6288 | 3576 | 28                             | 1.2 |
| F(6)  | 6278  | 6857 | 3057 | 26                             | 1.1 |

Table S6. The two compounds in this work and Sb<sup>3+</sup> containing sulfates with reported birefringence.

| Compound                                                                     | Space group                                     | Birefringence        | Cutoff edge   | Bandgap        |
|------------------------------------------------------------------------------|-------------------------------------------------|----------------------|---------------|----------------|
| <b>(NH<sub>4</sub>)<sub>2</sub>Sb<sub>2</sub>SO<sub>4</sub>F<sub>6</sub></b> | <b><i>P2<sub>1</sub>/c</i></b>                  | <b>0.055@1064 nm</b> | <b>236 nm</b> | <b>4.74 eV</b> |
| <b>Na<sub>2</sub>Sb<sub>2</sub>SO<sub>4</sub>F<sub>6</sub></b>               | <b><i>P2<sub>1</sub>/c</i></b>                  | <b>0.100@1064 nm</b> | <b>218 nm</b> | <b>4.73 eV</b> |
| NH <sub>4</sub> Sb(SO <sub>4</sub> ) <sub>2</sub>                            | <i>P2<sub>1</sub>2<sub>1</sub>2<sub>1</sub></i> | 0.150@546 nm         | 280 nm        | 4.43 eV        |
| NH <sub>4</sub> SbSO <sub>4</sub> F <sub>2</sub>                             | <i>Pna2<sub>1</sub></i>                         | 0.138@1064 nm        | 265 nm        | 4.67 eV        |
| NH <sub>4</sub> SbSO <sub>4</sub> Cl <sub>2</sub>                            | <i>P2<sub>1</sub>2<sub>1</sub>2<sub>1</sub></i> | 0.09@1064 nm         | -             | 4.54 eV        |
| K <sub>2</sub> SbSO <sub>4</sub> F <sub>3</sub>                              | <i>P2<sub>1</sub>2<sub>1</sub>2<sub>1</sub></i> | 0.080@1064 nm        | 279 nm        | 4.44 eV        |
| K <sub>4</sub> Sb(SO <sub>4</sub> ) <sub>3</sub> Cl                          | <i>P6<sub>1</sub></i>                           | 0.066@546 nm         | -             | 4.12 eV        |
| RbSb(SO <sub>4</sub> ) <sub>2</sub>                                          | <i>P2<sub>1</sub>/n</i>                         | 0.187@546 nm         | 281 nm        | -              |
| RbSbSO <sub>4</sub> F <sub>2</sub>                                           | <i>Pna2<sub>1</sub></i>                         | 0.100@1064 nm        | -             | 4.75 eV        |
| RbSbSO <sub>4</sub> Cl <sub>2</sub>                                          | <i>P2<sub>1</sub>2<sub>1</sub>2<sub>1</sub></i> | 0.110@1064 nm        | -             | 3.48 eV        |
| Rb <sub>2</sub> SbSO <sub>4</sub> F <sub>3</sub>                             | <i>P2<sub>1</sub>2<sub>1</sub>2<sub>1</sub></i> | 0.090@1064 nm        | 298 nm        | 4.15 eV        |
| Rb <sub>2</sub> Sb <sub>2</sub> SO <sub>4</sub> F <sub>6</sub>               | <i>P2<sub>1</sub></i>                           | 0.110@1064 nm        | 264 nm        | 4.69 eV        |
| CsSb(SO <sub>4</sub> ) <sub>2</sub>                                          | <i>P2<sub>1</sub>2<sub>1</sub>2<sub>1</sub></i> | 0.189@546 nm         | 278 nm        | 4.68 eV        |
| CsSbSO <sub>4</sub> F <sub>2</sub>                                           | <i>Pna2<sub>1</sub></i>                         | 0.112@1064 nm        | 240 nm        | 4.76 eV        |

Table S7. The density of  $\text{Sb}^{3+}$  cations in a unit cell.

| Compound                                          | $n$ (Sb) | $V$ ( $\text{\AA}^3$ ) | $\rho$ (Sb) ( $\text{\AA}^{-3}$ ) | Birefringence |
|---------------------------------------------------|----------|------------------------|-----------------------------------|---------------|
| $(\text{NH}_4)_2\text{Sb}_2\text{SO}_4\text{F}_6$ | 8        | 1,078.71               | 0.0074                            | 0.055@1064 nm |
| $\text{Na}_2\text{Sb}_2\text{SO}_4\text{F}_6$     | 8        | 934.97                 | 0.0086                            | 0.100@1064 nm |

$n$ : The number of  $\text{Sb}^{3+}$  cations in a unit cell.

$V$ : The cell volume.

$\rho$ : The density of  $\text{Sb}^{3+}$  cations in a unit cell,  $\rho = n / V$ .

- [1] Dolomanov O.V.; Bourhis L.J.; Gildea R.J.; Howard J.A.K.; Puschmann H. OLEX2: A Complete Structure Solution, Refinement and Analysis Program. *J. Appl. Crystallogr.*, **2009**, 42, 339–341.
- [2] Sheldrick G. M. A short history of SHELX. *Acta Crystallogr., Sec. A: Found. Crystallogr.* **2008**, 64, 112–122.
- [3] Spek A. L. Single-crystal structure validation with the program PLATON. *J. Appl. Crystallogr.* **2003**, 36, 7–13.
- [4] Sham L. J.; Schlüter M. Density-Functional Theory of the Energy Gap. *Phys. Rev. Lett.*, **1983**, 51, 1888–1891.
- [5] Kang L.; Ramo D. M.; Lin Z. S.; Bristowe P. D.; Qin J. G.; Chen C. T. First principles selection and design of mid-IR nonlinear optical halide crystals. *J. Mater. Chem. C*, **2013**, 1, 7363–7370.
